# Supplementary material
Source: ML conference proceedings conference paper supplement (https://proceedings.mlr.press/v32/zhanga14.html)
Supplement: Supplementary file 1 [file zhanga14-supp.pdf]

## Supplementary Material

Table 2. Results for the 33 benchmark problems that were not solved (near) optimally by all solvers: comparison of the gap between  $V^L(b_0)$  and  $V^U(b_0)$ , lower bound  $V^L(b_0)$ , upper bound  $V^U(b_0)$ , the number of  $\alpha$ -vectors ( $|\Gamma|$ ) to represent  $V^L$  and time (seconds) for runs terminated after 1,000 seconds or when the gap is less than one unit at the 3rd significant digit. The smallest gaps or the highest lower bounds among algorithms are labeled with red color. Note that HSVI2, SARSOP and GapMin’s results were reported in Tables 1 and 2 in (Poupart et al., 2011).

| Algorithm                                                            | Gap   | $V^L(b_0)$ | $V^U(b_0)$ | $ \Gamma $ | Time  | Algorithm                                                            | Gap   | $V^L(b_0)$ | $V^U(b_0)$ | $ \Gamma $ | Time  |
|----------------------------------------------------------------------|-------|------------|------------|------------|-------|----------------------------------------------------------------------|-------|------------|------------|------------|-------|
| <b>aloha.10</b><br>( $ S  = 30,  A  = 9,  Z  = 3, \gamma = 0.999$ )  |       |            |            |            |       | <b>aloha.30</b><br>( $ S  = 90,  A  = 29,  Z  = 3, \gamma = 0.999$ ) |       |            |            |            |       |
| HSVI2                                                                | 9.0   | 535.4      | 544.4      | 4,729      | 997   | HSVI2                                                                | 38    | 1,212      | 1,249      | 2,062      | 1,000 |
| SARSOP                                                               | 9.5   | 535.2      | 544.7      | 48         | 1,000 | SARSOP                                                               | 74    | 1,177      | 1,252      | 86         | 999   |
| GapMin ST                                                            | 10.3  | 534.1      | 544.4      | 136        | 673   | GapMin ST                                                            | 113   | 1,136      | 1,249      | 44         | 800   |
| GapMin LP                                                            | 7.6   | 536.5      | 544.2      | 152        | 968   | GapMin LP                                                            | 111   | 1,136      | 1,247      | 46         | 799   |
| PGVI                                                                 | 7.3   | 537.4      | 544.7      | 58         | 999   | PGVI                                                                 | 19    | 1,231      | 1,250      | 342        | 994   |
| <b>cheng.D3-1</b><br>( $ S  = 3,  A  = 3,  Z  = 3, \gamma = 0.999$ ) |       |            |            |            |       | <b>cheng.D3-2</b><br>( $ S  = 3,  A  = 3,  Z  = 3, \gamma = 0.999$ ) |       |            |            |            |       |
| HSVI2                                                                | 11    | 6,417      | 6,428      | 16         | 997   | HSVI2                                                                | 10    | 8,240      | 8,250      | 8          | 404   |
| SARSOP                                                               | 15    | 6,417      | 6,432      | 10         | 1,000 | SARSOP                                                               | 12    | 8,240      | 8,252      | 6          | 1,000 |
| GapMin ST                                                            | 10    | 6,412      | 6,422      | 8          | 26    | GapMin ST                                                            | 10    | 8,235      | 8,245      | 3          | 15    |
| GapMin LP                                                            | 10    | 6,412      | 6,422      | 8          | 25    | GapMin LP                                                            | 10    | 8,235      | 8,245      | 3          | 22    |
| PGVI                                                                 | 10    | 6,417      | 6,427      | 8          | 990   | PGVI                                                                 | 10    | 8,240      | 8,250      | 4          | 59    |
| <b>cheng.D3-3</b><br>( $ S  = 3,  A  = 3,  Z  = 3, \gamma = 0.999$ ) |       |            |            |            |       | <b>cheng.D3-4</b><br>( $ S  = 3,  A  = 3,  Z  = 3, \gamma = 0.999$ ) |       |            |            |            |       |
| HSVI2                                                                | 105   | 7,457      | 7,562      | 13         | 991   | HSVI2                                                                | 41    | 5,827      | 5,868      | 15         | 993   |
| SARSOP                                                               | 129   | 7,457      | 7,585      | 8          | 999   | SARSOP                                                               | 48    | 5,827      | 5,875      | 5          | 1,000 |
| GapMin ST                                                            | 10    | 7,452      | 7,462      | 7          | 56    | GapMin ST                                                            | 10    | 5,822      | 5,832      | 8          | 78    |
| GapMin LP                                                            | 10    | 7,452      | 7,462      | 7          | 37    | GapMin LP                                                            | 10    | 5,822      | 5,832      | 5          | 37    |
| PGVI                                                                 | 102   | 7,457      | 7,559      | 14         | 999   | PGVI                                                                 | 39    | 5,827      | 5,866      | 19         | 999   |
| <b>cheng.D3-5</b><br>( $ S  = 3,  A  = 3,  Z  = 3, \gamma = 0.999$ ) |       |            |            |            |       | <b>cheng.D4-1</b><br>( $ S  = 4,  A  = 4,  Z  = 4, \gamma = 0.999$ ) |       |            |            |            |       |
| HSVI2                                                                | 26    | 8,673      | 8,698      | 63         | 990   | HSVI2                                                                | 167   | 6,715      | 6,882      | 19         | 999   |
| SARSOP                                                               | 34    | 8,673      | 8,706      | 10         | 1,000 | SARSOP                                                               | 180   | 6,715      | 6,894      | 10         | 1,000 |
| GapMin ST                                                            | 10    | 8,668      | 8,678      | 9          | 34    | GapMin ST                                                            | 10    | 6,710      | 6,720      | 11         | 553   |
| GapMin LP                                                            | 10    | 8,668      | 8,678      | 10         | 15    | GapMin LP                                                            | 10    | 6,711      | 6,721      | 11         | 288   |
| PGVI                                                                 | 31    | 8,673      | 8,703      | 19         | 1,000 | PGVI                                                                 | 171   | 6,715      | 6,886      | 11         | 999   |
| <b>cheng.D4-2</b><br>( $ S  = 4,  A  = 4,  Z  = 4, \gamma = 0.999$ ) |       |            |            |            |       | <b>cheng.D4-3</b><br>( $ S  = 4,  A  = 4,  Z  = 4, \gamma = 0.999$ ) |       |            |            |            |       |
| HSVI2                                                                | 63    | 8,381      | 8,443      | 22         | 995   | HSVI2                                                                | 55    | 7,661      | 7,715      | 20         | 997   |
| SARSOP                                                               | 71    | 8,378      | 8,450      | 8          | 999   | SARSOP                                                               | 60    | 7,660      | 7,721      | 11         | 1,000 |
| GapMin ST                                                            | 10    | 8,376      | 8,386      | 12         | 135   | GapMin ST                                                            | 10    | 7,656      | 7,666      | 10         | 91    |
| GapMin LP                                                            | 10    | 8,376      | 8,386      | 13         | 115   | GapMin LP                                                            | 10    | 7,656      | 7,666      | 10         | 68    |
| PGVI                                                                 | 64    | 8,381      | 8,445      | 9          | 1,000 | PGVI                                                                 | 55    | 7,661      | 7,715      | 11         | 999   |
| <b>cheng.D4-4</b><br>( $ S  = 4,  A  = 4,  Z  = 4, \gamma = 0.999$ ) |       |            |            |            |       | <b>cheng.D4-5</b><br>( $ S  = 4,  A  = 4,  Z  = 4, \gamma = 0.999$ ) |       |            |            |            |       |
| HSVI2                                                                | 65    | 7,670      | 7,735      | 18         | 997   | HSVI2                                                                | 91    | 7,884      | 7,975      | 35         | 994   |
| SARSOP                                                               | 69    | 7,669      | 7,738      | 6          | 1,000 | SARSOP                                                               | 96    | 7,884      | 7,980      | 14         | 1,000 |
| GapMin ST                                                            | 10    | 7,665      | 7,675      | 16         | 313   | GapMin ST                                                            | 10    | 7,879      | 7,889      | 19         | 415   |
| GapMin LP                                                            | 10    | 7,665      | 7,675      | 11         | 109   | GapMin LP                                                            | 10    | 7,879      | 7,889      | 17         | 197   |
| PGVI                                                                 | 64    | 7,670      | 7,734      | 16         | 1,000 | PGVI                                                                 | 90    | 7,884      | 7,974      | 18         | 998   |
| <b>cheng.D5-1</b><br>( $ S  = 5,  A  = 3,  Z  = 3, \gamma = 0.999$ ) |       |            |            |            |       | <b>cit</b><br>( $ S  = 284,  A  = 4,  Z  = 28, \gamma = 0.990$ )     |       |            |            |            |       |
| HSVI2                                                                | 59    | 6,549      | 6,608      | 19         | 996   | HSVI2                                                                | 0.095 | 0.743      | 0.838      | 3,739      | 975   |
| SARSOP                                                               | 64    | 6,549      | 6,613      | 9          | 999   | SARSOP                                                               | 0.049 | 0.791      | 0.840      | 3,108      | 967   |
| GapMin ST                                                            | 10    | 6,544      | 6,554      | 1          | 26    | GapMin ST                                                            | 0.838 | 0.000      | 0.838      | 1          | 802   |
| GapMin LP                                                            | 10    | 6,544      | 6,554      | 1          | 25    | GapMin LP                                                            | 0.838 | 0.000      | 0.838      | 1          | 855   |
| PGVI                                                                 | 54    | 6,549      | 6,603      | 12         | 999   | PGVI                                                                 | 0.016 | 0.822      | 0.838      | 6,748      | 990   |
| <b>tiger-grid</b> ( $ S  = 81,  A  = 4,  Z  = 3, \gamma = 0.990$ )   |       |            |            |            |       | GapMin ST 0.106 2.296 2.402 386 912                                  |       |            |            |            |       |
| HSVI2                                                                | 0.388 | 2.138      | 2.525      | 3,394      | 990   | GapMin LP                                                            | 0.132 | 2.271      | 2.402      | 255        | 923   |
| SARSOP                                                               | 0.262 | 2.267      | 2.529      | 945        | 997   | PGVI                                                                 | 0.215 | 2.293      | 2.508      | 1,947      | 991   |

**Covering Number for Efficient Heuristic-based POMDP Planning**

Table 3. Results continued (1,000 seconds limit).

| Algorithm                                                               | Gap   | $V^L(b_0)$ | $V^U(b_0)$ | $ \Gamma $ | Time  | Algorithm                                                               | Gap   | $V^L(b_0)$ | $V^U(b_0)$ | $ \Gamma $ | Time  |
|-------------------------------------------------------------------------|-------|------------|------------|------------|-------|-------------------------------------------------------------------------|-------|------------|------------|------------|-------|
| <b>ejs1</b><br>( $ S  = 3,  A  = 4,  Z  = 2, \gamma = 0.999$ )          |       |            |            |            |       | <b>ejs2</b><br>( $ S  = 2,  A  = 2,  Z  = 2, \gamma = 0.999$ )          |       |            |            |            |       |
| HSVI2                                                                   | 7.8   | 421.3      | 429.1      | 13         | 991   | HSVI2                                                                   | 91    | 1,781      | 1,872      | 8          | 997   |
| SARSOP                                                                  | 48.8  | 421.3      | 470.1      | 9          | 1,000 | SARSOP                                                                  | 115   | 1,781      | 1,896      | 7          | 1,000 |
| GapMin ST                                                               | 0.4   | 421.1      | 421.5      | 9          | 52    | GapMin ST                                                               | 10    | 1,777      | 1,787      | 6          | 22    |
| GapMin LP                                                               | 0.3   | 421.2      | 421.6      | 9          | 65    | GapMin LP                                                               | 10    | 1,776      | 1,786      | 6          | 13    |
| PGVI                                                                    | 0.1   | 421.3      | 421.4      | 9          | 184   | PGVI                                                                    | 83    | 1,781      | 1,864      | 7          | 1,000 |
| <b>ejs4</b><br>( $ S  = 3,  A  = 2,  Z  = 2, \gamma = 0.999$ )          |       |            |            |            |       | <b>fourth</b><br>( $ S  = 1,052,  A  = 4,  Z  = 28, \gamma = 0.990$ )   |       |            |            |            |       |
| HSVI2                                                                   | 20.2  | -133.6     | -113.4     | 7          | 999   | HSVI2                                                                   | 0.376 | 0.242      | 0.617      | 3,345      | 994   |
| SARSOP                                                                  | 22.8  | -133.6     | -110.8     | 2          | 1,000 | SARSOP                                                                  | 0.330 | 0.288      | 0.618      | 3,595      | 975   |
| GapMin ST                                                               | 1.0   | -134.1     | -133.1     | 2          | 26    | GapMin ST                                                               | 0.618 | 0.000      | 0.618      | 1          | 532   |
| GapMin LP                                                               | 1.0   | -134.1     | -133.1     | 2          | 13    | GapMin LP                                                               | 0.618 | 0.000      | 0.618      | 1          | 669   |
| PGVI                                                                    | 15.5  | -133.6     | -118.0     | 2          | 1,000 | PGVI                                                                    | 0.142 | 0.475      | 0.617      | 6,166      | 984   |
| <b>hallway2</b><br>( $ S  = 92,  A  = 5,  Z  = 17, \gamma = 0.950$ )    |       |            |            |            |       | <b>hallway</b><br>( $ S  = 60,  A  = 5,  Z  = 21, \gamma = 0.950$ )     |       |            |            |            |       |
| HSVI2                                                                   | 0.525 | 0.361      | 0.886      | 2,393      | 997   | HSVI2                                                                   | 0.250 | 0.945      | 1.195      | 1,367      | 996   |
| SARSOP                                                                  | 0.525 | 0.374      | 0.898      | 262        | 992   | SARSOP                                                                  | 0.210 | 0.995      | 1.206      | 456        | 998   |
| GapMin ST                                                               | 0.372 | 0.417      | 0.789      | 294        | 940   | GapMin ST                                                               | 0.078 | 1.008      | 1.086      | 290        | 765   |
| GapMin LP                                                               | 0.428 | 0.362      | 0.790      | 153        | 759   | GapMin LP                                                               | 0.085 | 1.003      | 1.089      | 159        | 845   |
| PGVI                                                                    | 0.422 | 0.440      | 0.862      | 736        | 996   | PGVI                                                                    | 0.176 | 1.004      | 1.180      | 838        | 1,000 |
| <b>iff</b><br>( $ S  = 104,  A  = 4,  Z  = 22, \gamma = 0.999$ )        |       |            |            |            |       | <b>learning.c2</b><br>( $ S  = 12,  A  = 8,  Z  = 3, \gamma = 0.999$ )  |       |            |            |            |       |
| HSVI2                                                                   | 0.924 | 8.931      | 9.855      | 7,134      | 999   | HSVI2                                                                   | 0.090 | 1.549      | 1.639      | 4,082      | 996   |
| SARSOP                                                                  | 0.775 | 9.095      | 9.871      | 6,811      | 997   | SARSOP                                                                  | 0.093 | 1.556      | 1.648      | 4,903      | 996   |
| GapMin ST                                                               | 0.722 | 9.214      | 9.936      | 544        | 785   | GapMin ST                                                               | 0.078 | 1.553      | 1.631      | 810        | 893   |
| GapMin LP                                                               | 0.660 | 9.261      | 9.920      | 532        | 940   | GapMin LP                                                               | 0.024 | 1.558      | 1.582      | 470        | 885   |
| PGVI                                                                    | 0.657 | 9.233      | 9.890      | 12,795     | 999   | PGVI                                                                    | 0.055 | 1.558      | 1.613      | 13,606     | 997   |
| <b>learning.c3</b><br>( $ S  = 24,  A  = 12,  Z  = 3, \gamma = 0.999$ ) |       |            |            |            |       | <b>learning.c4</b><br>( $ S  = 48,  A  = 16,  Z  = 3, \gamma = 0.999$ ) |       |            |            |            |       |
| HSVI2                                                                   | 0.250 | 2.364      | 2.614      | 4,229      | 988   | HSVI2                                                                   | 0.567 | 3.055      | 3.622      | 4,569      | 999   |
| SARSOP                                                                  | 0.222 | 2.446      | 2.668      | 981        | 997   | SARSOP                                                                  | 0.321 | 3.358      | 3.679      | 923        | 982   |
| GapMin ST                                                               | 0.214 | 2.442      | 2.655      | 446        | 944   | GapMin ST                                                               | 0.363 | 3.308      | 3.671      | 349        | 858   |
| GapMin LP                                                               | 0.180 | 2.441      | 2.622      | 515        | 947   | GapMin LP                                                               | 0.353 | 3.306      | 3.658      | 500        | 989   |
| PGVI                                                                    | 0.192 | 2.450      | 2.642      | 9,423      | 982   | PGVI                                                                    | 0.296 | 3.367      | 3.663      | 7,436      | 991   |
| <b>machine</b><br>( $ S  = 256,  A  = 4,  Z  = 16, \gamma = 0.990$ )    |       |            |            |            |       | <b>milos-aaai97</b><br>( $ S  = 20,  A  = 6,  Z  = 8, \gamma = 0.900$ ) |       |            |            |            |       |
| HSVI2                                                                   | 3.49  | 63.18      | 66.66      | 662        | 982   | HSVI2                                                                   | 18.31 | 49.15      | 67.46      | 3,965      | 998   |
| SARSOP                                                                  | 3.57  | 63.18      | 66.75      | 150        | 998   | SARSOP                                                                  | 19.61 | 49.74      | 69.35      | 3,699      | 997   |
| GapMin ST                                                               | 2.98  | 62.93      | 65.90      | 77         | 817   | GapMin ST                                                               | 17.67 | 49.89      | 67.55      | 1,212      | 774   |
| GapMin LP                                                               | 3.20  | 62.39      | 65.59      | 67         | 856   | GapMin LP                                                               | 15.42 | 49.97      | 65.39      | 581        | 730   |
| PGVI                                                                    | 3.09  | 63.18      | 66.27      | 209        | 990   | PGVI                                                                    | 17.40 | 50.06      | 67.46      | 10,096     | 980   |
| <b>query.s2</b><br>( $ S  = 9,  A  = 2,  Z  = 3, \gamma = 0.990$ )      |       |            |            |            |       | <b>mit</b><br>( $ S  = 204,  A  = 4,  Z  = 28, \gamma = 0.990$ )        |       |            |            |            |       |
| HSVI2                                                                   | 4.2   | 490.7      | 495.0      | 1,366      | 992   | HSVI2                                                                   | 0.094 | 0.791      | 0.885      | 5,539      | 1,000 |
| SARSOP                                                                  | 5.5   | 490.7      | 496.3      | 113        | 999   | SARSOP                                                                  | 0.067 | 0.819      | 0.885      | 2,820      | 999   |
| GapMin ST                                                               | 1.0   | 490.4      | 491.4      | 37         | 224   | GapMin ST                                                               | 0.039 | 0.845      | 0.884      | 152        | 806   |
| GapMin LP                                                               | 1.0   | 490.5      | 491.5      | 31         | 57    | GapMin LP                                                               | 0.055 | 0.828      | 0.883      | 120        | 859   |
| PGVI                                                                    | 3.8   | 490.7      | 494.6      | 495        | 1,000 | PGVI                                                                    | 0.028 | 0.857      | 0.885      | 6,218      | 999   |
| <b>query.s3</b><br>( $ S  = 27,  A  = 3,  Z  = 3, \gamma = 0.990$ )     |       |            |            |            |       | <b>pentagon</b><br>( $ S  = 212,  A  = 4,  Z  = 28, \gamma = 0.990$ )   |       |            |            |            |       |
| HSVI2                                                                   | 26.2  | 546.8      | 573.1      | 1,203      | 997   | HSVI2                                                                   | 0.192 | 0.634      | 0.826      | 4,361      | 997   |
| SARSOP                                                                  | 28.1  | 546.8      | 574.8      | 112        | 999   | SARSOP                                                                  | 0.131 | 0.696      | 0.827      | 3,196      | 971   |
| GapMin ST                                                               | 10.8  | 546.7      | 557.5      | 154        | 686   | GapMin ST                                                               | 0.826 | 0.000      | 0.826      | 1          | 990   |
| GapMin LP                                                               | 7.0   | 546.7      | 553.7      | 119        | 706   | GapMin LP                                                               | 0.826 | 0.000      | 0.826      | 1          | 893   |
| PGVI                                                                    | 26.0  | 546.9      | 572.9      | 549        | 1,000 | PGVI                                                                    | 0.072 | 0.754      | 0.826      | 5,842      | 996   |
| <b>query.s4</b><br>( $ S  = 81,  A  = 4,  Z  = 3, \gamma = 0.990$ )     |       |            |            |            |       | <b>sunysb</b><br>( $ S  = 300,  A  = 4,  Z  = 28, \gamma = 0.990$ )     |       |            |            |            |       |
| HSVI2                                                                   | 51.9  | 569.5      | 621.4      | 2,846      | 999   | HSVI2                                                                   | 0.240 | 0.557      | 0.796      | 4,370      | 997   |
| SARSOP                                                                  | 54.3  | 569.1      | 623.4      | 166        | 1,000 | SARSOP                                                                  | 0.323 | 0.475      | 0.798      | 3,537      | 986   |
| GapMin ST                                                               | 46.1  | 569.6      | 615.6      | 377        | 958   | GapMin ST                                                               | 0.796 | 0.000      | 0.796      | 1          | 930   |
| GapMin LP                                                               | 43.2  | 569.5      | 612.7      | 169        | 939   | GapMin LP                                                               | 0.796 | 0.000      | 0.796      | 1          | 974   |
| PGVI                                                                    | 52.2  | 569.6      | 621.8      | 446        | 979   | PGVI                                                                    | 0.137 | 0.659      | 0.796      | 5,974      | 987   |

**Covering Number for Efficient Heuristic-based POMDP Planning**

Table 4. Results for 8 problems of the 18 problems that were not solved (near) optimally by any of the solvers, with 50,000 seconds limit. The smallest gaps or the highest lower bounds among algorithms are labeled with red color. Note that HSVI2, SARSOP and GapMin’s results were reported in Table 3 in (Poupart et al., 2011).

| Algorithm                                                             | Gap          | $V^L(b_0)$   | $V^U(b_0)$ | $ \Gamma $ | Time   | Algorithm                                                           | Gap          | $V^L(b_0)$   | $V^U(b_0)$ | $ \Gamma $ | Time   |
|-----------------------------------------------------------------------|--------------|--------------|------------|------------|--------|---------------------------------------------------------------------|--------------|--------------|------------|------------|--------|
| <b>cit</b><br>( $ S  = 284,  A  = 4,  Z  = 28, \gamma = 0.990$ )      |              |              |            |            |        | <b>hallway</b><br>( $ S  = 60,  A  = 5,  Z  = 21, \gamma = 0.950$ ) |              |              |            |            |        |
| HSVI2                                                                 | 0.018        | 0.819        | 0.837      | 29,803     | 49,760 | HSVI2                                                               | 0.179        | 0.994        | 1.173      | 15,374     | 49,951 |
| SARSOP                                                                | 0.017        | 0.823        | 0.840      | 21,168     | 49,916 | SARSOP                                                              | 0.178        | 1.013        | 1.191      | 3,053      | 49,992 |
| GapMin ST                                                             | 0.023        | 0.814        | 0.837      | 739        | 48,931 | GapMin ST                                                           | 0.043        | 1.015        | 1.058      | 947        | 34,828 |
| GapMin LP                                                             | 0.015        | 0.822        | 0.836      | 648        | 45,473 | GapMin LP                                                           | <b>0.036</b> | 1.016        | 1.051      | 851        | 43,184 |
| PGVI                                                                  | <b>0.007</b> | <b>0.831</b> | 0.838      | 32,041     | 49,861 | PGVI                                                                | 0.134        | <b>1.017</b> | 1.150      | 18,902     | 49,831 |
| <b>hallway2</b><br>( $ S  = 92,  A  = 5,  Z  = 17, \gamma = 0.950$ )  |              |              |            |            |        | <b>iff</b><br>( $ S  = 104,  A  = 4,  Z  = 22, \gamma = 0.999$ )    |              |              |            |            |        |
| HSVI2                                                                 | 0.421        | 0.432        | 0.853      | 18,505     | 49,983 | HSVI2                                                               | 0.199        | 9.302        | 9.501      | 40,984     | 50,000 |
| SARSOP                                                                | 0.448        | 0.434        | 0.882      | 1,901      | 49,973 | SARSOP                                                              | 0.290        | 9.259        | 9.549      | 54,016     | 49,966 |
| GapMin ST                                                             | 0.262        | 0.461        | 0.723      | 1,647      | 46,687 | GapMin ST                                                           | 0.634        | 9.273        | 9.908      | 1,614      | 34,472 |
| GapMin LP                                                             | <b>0.226</b> | 0.468        | 0.694      | 1,135      | 36,766 | GapMin LP                                                           | <b>0.156</b> | <b>9.275</b> | 9.431      | 1,626      | 40,046 |
| PGVI                                                                  | 0.340        | <b>0.485</b> | 0.825      | 3,846      | 49,999 | PGVI                                                                | 0.237        | 9.267        | 9.504      | 63,784     | 49,978 |
| <b>machine</b><br>( $ S  = 256,  A  = 4,  Z  = 16, \gamma = 0.990$ )  |              |              |            |            |        | <b>mit</b><br>( $ S  = 204,  A  = 4,  Z  = 28, \gamma = 0.990$ )    |              |              |            |            |        |
| HSVI2                                                                 | 2.89         | <b>63.18</b> | 66.07      | 7,857      | 49,998 | HSVI2                                                               | 0.058        | 0.827        | 0.885      | 34,461     | 49,942 |
| SARSOP                                                                | 3.02         | <b>63.18</b> | 66.20      | 996        | 49,963 | SARSOP                                                              | 0.020        | 0.866        | 0.885      | 20,662     | 49,616 |
| GapMin ST                                                             | 1.67         | 63.17        | 64.84      | 139        | 49,261 | GapMin ST                                                           | 0.011        | 0.871        | 0.882      | 861        | 41,564 |
| GapMin LP                                                             | <b>1.14</b>  | 63.17        | 64.30      | 173        | 49,036 | GapMin LP                                                           | <b>0.009</b> | 0.872        | 0.881      | 832        | 43,680 |
| PGVI                                                                  | 2.45         | <b>63.18</b> | 65.63      | 592        | 49,987 | PGVI                                                                | 0.011        | <b>0.874</b> | 0.885      | 30,598     | 49,911 |
| <b>pentagon</b><br>( $ S  = 212,  A  = 4,  Z  = 28, \gamma = 0.990$ ) |              |              |            |            |        | <b>sunysb</b><br>( $ S  = 36,  A  = 5,  Z  = 17, \gamma = 0.950$ )  |              |              |            |            |        |
| HSVI2                                                                 | 0.135        | 0.691        | 0.826      | 29,033     | 49,924 | HSVI2                                                               | 0.217        | 2.286        | 2.502      | 28,182     | 49,978 |
| SARSOP                                                                | 0.070        | 0.757        | 0.827      | 21,950     | 49,994 | SARSOP                                                              | 0.231        | 2.290        | 2.522      | 5,333      | 49,987 |
| GapMin ST                                                             | 0.825        | 0.000        | 0.825      | 1          | 44,437 | GapMin ST                                                           | 0.055        | <b>2.322</b> | 2.377      | 2,404      | 38,675 |
| GapMin LP                                                             | 0.150        | 0.675        | 0.824      | 425        | 40,436 | GapMin LP                                                           | <b>0.052</b> | 2.321        | 2.373      | 2,404      | 43,254 |
| PGVI                                                                  | <b>0.026</b> | <b>0.800</b> | 0.826      | 29,292     | 49,845 | PGVI                                                                | 0.160        | 2.317        | 2.477      | 20,836     | 49,935 |

Table 5. Parameters for the 35 small benchmark problems that PGVI could find near optimal solutions within 1,000 seconds.

| Problem           | $ S $ | $ A $ | $ Z $ | $\gamma$ | Problem           | $ S $ | $ A $ | $ Z $ | $\gamma$ |
|-------------------|-------|-------|-------|----------|-------------------|-------|-------|-------|----------|
| 1d                | 4     | 2     | 2     | 0.750    | 4x3.95            | 11    | 4     | 6     | 0.950    |
| 4x5x2.95          | 39    | 4     | 4     | 0.950    | bridge-repair     | 5     | 12    | 5     | 0.950    |
| cheese.95         | 11    | 4     | 7     | 0.950    | cheese-taxi       | 34    | 7     | 10    | 0.950    |
| cheng.D3-1        | 3     | 3     | 3     | 0.999    | cheng.D3-2        | 3     | 3     | 3     | 0.999    |
| concert           | 2     | 3     | 2     | 0.999    | ejs1              | 3     | 4     | 2     | 0.999    |
| ejs3              | 2     | 2     | 2     | 0.999    | ejs5              | 2     | 2     | 2     | 0.999    |
| ejs6              | 2     | 2     | 2     | 0.999    | ejs7              | 2     | 2     | 2     | 0.999    |
| ejs-ft-counter    | 2     | 2     | 2     | 0.900    | line4-2goals      | 4     | 2     | 1     | 0.999    |
| marking           | 9     | 4     | 3     | 0.870    | marking2          | 9     | 4     | 3     | 0.870    |
| mcc-example1      | 4     | 3     | 3     | 0.750    | mcc-example2      | 4     | 3     | 3     | 0.750    |
| mini-hall2        | 13    | 3     | 9     | 0.950    | network.95        | 7     | 4     | 2     | 0.950    |
| network           | 7     | 4     | 2     | 0.950    | paint.95          | 4     | 4     | 2     | 0.950    |
| parr95.95         | 7     | 3     | 6     | 0.950    | saci-s12-a6-z5.95 | 12    | 6     | 5     | 0.950    |
| saci-s100-a10-z31 | 100   | 10    | 31    | 0.950    | shuttle.95        | 8     | 3     | 5     | 0.950    |
| stand-tiger.95    | 4     | 4     | 4     | 0.950    | tiger.95          | 2     | 3     | 2     | 0.950    |
| tiger.aai         | 2     | 3     | 2     | 0.750    | web-ad            | 4     | 3     | 5     | 0.950    |
| web-mall          | 2     | 3     | 2     | 0.950    | hanks.95          | 4     | 4     | 2     | 0.950    |
| baseball          | 7,681 | 6     | 9     | 0.999    |                   |       |       |       |          |

Table 6. PGVI’s results for the 35 small benchmark problems that it could find a near optimal solution (gap smaller than one unit at the third significant digit) within 1,000 seconds. The linear correlation coefficient between  $|\Gamma|$  and  $Time$  is  $-0.0451$ , the linear correlation coefficient between  $|S|$  and  $Time$  is  $-0.0406$ , the linear correlation coefficient between  $|B^s|$  and  $Time$  is  $0.9842$ , and the linear correlation coefficient between  $\widehat{\mathcal{P}}_{f,L}^{g,U}(\delta)$  with  $\delta = 10^{-6}$  and  $Time$  is  $0.9869$ .

| Problem           | Gap   | $V^L(b_0)$ | $V^U(b_0)$ | $ \Gamma $ | $ B^s $ | $\widehat{\mathcal{P}}_{f,L}^{g,U}(\delta)$ | $Time$ (s) |
|-------------------|-------|------------|------------|------------|---------|---------------------------------------------|------------|
| ld                | 0.00  | 1.26       | 1.26       | 6          | 9       | 9                                           | 0.00       |
| 4×3.95            | 0.01  | 1.89       | 1.90       | 227        | 152     | 152                                         | 0.25       |
| 4×5×2.95          | 0.01  | 2.08       | 2.09       | 2,428      | 1,680   | 1,679                                       | 30.62      |
| bridge-repair     | 63    | 40,421     | 40,484     | 7          | 22      | 21                                          | 0.02       |
| cheese.95         | 0.01  | 3.48       | 3.49       | 56         | 12      | 12                                          | 0.02       |
| cheese-taxi       | 0.00  | 2.48       | 2.48       | 174        | 33      | 33                                          | 0.02       |
| cheng.D3-1        | 10    | 6,417      | 6,427      | 8          | 31,565  | 26,202                                      | 989.98     |
| cheng.D3-2        | 10    | 8,240      | 8,250      | 6          | 6,920   | 4,802                                       | 85.06      |
| concert           | 0.00  | 0          | 0          | 1          | 1       | 1                                           | 0.01       |
| ejs1              | 1     | 421        | 422        | 9          | 12,089  | 11,359                                      | 448.04     |
| ejs3              | 0     | 1,712      | 1,712      | 5          | 12      | 11                                          | 0.07       |
| ejs5              | 0     | 0          | 0          | 1          | 1       | 1                                           | 0.00       |
| ejs6              | 0     | 0          | 0          | 1          | 1       | 1                                           | 0.00       |
| ejs7              | 0     | 0          | 0          | 1          | 1       | 1                                           | 0.00       |
| ejs-ft-counter    | 0.00  | -3.18      | -3.18      | 3          | 2       | 2                                           | 0.00       |
| line4-2goals      | 0.00  | 0.47       | 0.47       | 2          | 3       | 3                                           | 0.00       |
| marking           | 0.00  | 2.75       | 2.75       | 50         | 16      | 16                                          | 0.01       |
| marking2          | 0.00  | 2.75       | 2.75       | 48         | 16      | 16                                          | 0.01       |
| mcc-example1      | 0.00  | 0.38       | 0.38       | 10         | 21      | 21                                          | 0.00       |
| mcc-example2      | 0.00  | 0.38       | 0.38       | 10         | 21      | 21                                          | 0.00       |
| mini-hall2        | 0.01  | 2.71       | 2.72       | 166        | 18      | 18                                          | 0.04       |
| network.95        | 1     | 293        | 294        | 24         | 3,023   | 3,023                                       | 10.40      |
| network           | 1     | 293        | 294        | 24         | 3,065   | 3,065                                       | 10.12      |
| paint.95          | 0.00  | 3.29       | 3.29       | 14         | 157     | 153                                         | 0.09       |
| parr95.95         | 0.01  | 7.19       | 7.20       | 8          | 7       | 7                                           | 0.01       |
| saci-s12-a6-z5.95 | 0.03  | 14.80      | 14.83      | 9          | 58      | 58                                          | 0.02       |
| saci-s100-a10-z31 | 0.06  | 16.56      | 16.62      | 2          | 29      | 29                                          | 0.41       |
| shuttle.95        | 0.10  | 32.79      | 32.89      | 109        | 6       | 6                                           | 0.02       |
| stand-tiger.95    | 0.08  | 50.38      | 50.46      | 136        | 40      | 40                                          | 0.09       |
| tiger.95          | 0.05  | 19.36      | 19.41      | 12         | 21      | 19                                          | 0.02       |
| tiger.aai         | 0.00  | 1.93       | 1.93       | 5          | 7       | 6                                           | 0.00       |
| web-ad            | 0.001 | 0.804      | 0.805      | 543        | 738     | 725                                         | 1.32       |
| web-mall          | 0.01  | 6.90       | 6.91       | 13         | 63      | 60                                          | 0.03       |
| hanks.95          | 0.01  | 3.29       | 3.30       | 14         | 157     | 153                                         | 0.14       |
| baseball          | 0.001 | 0.641      | 0.642      | 424        | 258     | 257                                         | 4.02       |

Table 7. Performance comparison, SARSOP and PGVI. Here,  $Time$  represents the total computation time, and  $T_0$  represents the initialization time on each test problem.

| Problem                    | Gap     | $Time$ (seconds) |         |                  | $Time - T_0$ (seconds) |         |                  |
|----------------------------|---------|------------------|---------|------------------|------------------------|---------|------------------|
|                            |         | SARSOP           | PGVI    | Speedup          | SARSOP                 | PGVI    | Speedup          |
| FieldVisionRockSample[5,5] | 0.47    | 9,764            | 2,570   | <b>3.80</b>      | 9,764                  | 2,570   | <b>3.80</b>      |
| Tracking                   | 0.69    | 9,998            | 2,294   | <b>4.36</b>      | 9,105                  | 1,401   | <b>6.50</b>      |
| Homecare                   | 3.43    | 9,987            | 1,819   | <b>5.49</b>      | 9,577                  | 1,409   | <b>6.80</b>      |
| 3D Navigation              | 754,977 | 9,934            | < 1,719 | <b>&gt; 5.78</b> | 9,922                  | < 1,707 | <b>&gt; 5.81</b> |
